# Supplementary material
Source: MDPI journal article supplement (https://www.mdpi.com/1424-2818/13/10/504)
Supplement: s1 [file s1]

**Table S3.** Characteristics of water transparency in the lake. Baikal

| St.<br>No. | Station<br>title        | Transparency (m)                  |                                    |                                   |                                             |                                   |
|------------|-------------------------|-----------------------------------|------------------------------------|-----------------------------------|---------------------------------------------|-----------------------------------|
|            |                         | Spring<br>2018<br>25.05–<br>28.05 | Summe<br>r 2018<br>01.08–<br>03.08 | Spring<br>2019<br>29.05-<br>31.05 | <b>*Summ<br/>er 2019</b><br>27.07-<br>07.08 | Autumn<br>2019<br>17.09–<br>19.09 |
| 1          | 12 km<br>from<br>Kultuk | 10                                | -                                  | 11                                | 6.5                                         | 7                                 |
| 2          | 3 km<br>from<br>Marituy | 11                                | 6                                  | 11.5                              | -                                           | 8                                 |
| 2*         | 7 km from<br>Marituy    | -                                 | -                                  | -                                 | 6                                           | -                                 |
| 3          | Marituy-<br>Solzan      | 10                                | 5                                  | 12.5                              | 6.5                                         | 7                                 |
| 4          | 3 km from<br>Solzan     | -                                 | 8                                  | -                                 | -                                           | 10                                |
| 5          | Tolsty-<br>Snezhnaya    | -                                 | 6                                  | 15                                | 5.5                                         | 7                                 |
| 6          | 3 km from<br>Listvyanka | 13                                | 5                                  | -                                 | 6                                           | 7                                 |
| 7          | Listvyanka-Tankhoy      | 16                                | 7                                  | 21                                | -                                           | -                                 |
| 8          | 3 km from<br>Tankhoy    | 11                                | -                                  | 15                                | 7                                           | -                                 |
| 9          | Kadilny-<br>Mishikha    | 16                                | -                                  | 19                                | 7.5                                         | -                                 |
