# Supplementary material
Source: MDPI journal article supplement (https://www.mdpi.com/1424-2818/13/10/504)
Supplement: s1 [file s1]

**Table S2.** Concentration of nutrients in the phatic water layer of Lake Baikal during the 2019 season

|                       | St.<br>No. | Station title           | Depth<br>m | Si<br>mg L <sup>-1</sup> | PO <sub>4</sub> <sup>3-</sup><br>mg L <sup>-1</sup> | NO <sub>3</sub> <sup>-</sup> mg<br>L <sup>-1</sup> |
|-----------------------|------------|-------------------------|------------|--------------------------|-----------------------------------------------------|----------------------------------------------------|
| May (Spring) of 2019  | 1          | 12 km from Kultuk       | 0-25       | 0.52                     | 0.023                                               | 0.39                                               |
|                       | 2          | 3 km from Marituy       | 0-25       | 0.53                     | 0.019                                               | 0.36                                               |
|                       | 3          | Marituy-Solzan          | 0-25       | 0.53                     | 0.017                                               | 0.36                                               |
|                       | 4          | 3 km from Solzan        | 0-25       | 0.52                     | 0.019                                               | 0.45                                               |
|                       | 5          | Tolsty-Snezhnaya        | 0-25       | -                        | -                                                   | -                                                  |
|                       | 6          | 3 km from<br>Listvyanka | 0-25       | 0.56                     | 0.023                                               | 0.47                                               |
|                       | 7          | 3 km from Tankhoy       | 0-25       | 0.56                     | 0.028                                               | 0.46                                               |
|                       | 8          | 3 km from Tankhoy       | 0-25       | 0.57                     | 0.015                                               | 0.33                                               |
| July (Summer) of 2019 | 1          | 12 km from Kultuk       | 0-25       | 0.43                     | 0.007                                               | 0.14                                               |
|                       | 2          | 3 km from Marituy       | 0-25       | 0.33                     | 0.017                                               | 0.27                                               |
|                       | 3          | Marituy-Solzan          | 0-25       | 0.40                     | 0.005                                               | 0.14                                               |
|                       | 4          | 3 km from Solzan        | 0-25       | 0.58                     | 0.013                                               | 0.14                                               |
|                       | 5          | Tolsty-Snezhnaya        | 0-25       | 0.61                     | 0.010                                               | 0.17                                               |
|                       | 6          | 3 km from<br>Listvyanka | 0-25       | 0.58                     | 0.010                                               | 0.07                                               |
|                       | 7          | 3 km from Tankhoy       | 0-25       | 0.54                     | 0.008                                               | 0.21                                               |
|                       | 8          | 3 km from Tankhoy       | 0-25       | 0.49                     | 0.012                                               | 0.18                                               |
