# Supplementary material
Source: MDPI journal article supplement (https://www.mdpi.com/1424-2818/13/10/504)
Supplement: s1 [file s1]

**Table S1.** Sampling stations and concentration of phytoplankton cells in the photic zone (1-25 m) of South Baikal in 2018-2019

| St. No. | Station title        | Coordinates                | Depth, m | Microalgae cell concentration in photic zone (10 <sup>3</sup> cells/L) |                   |                            |                   |                            |                   |                           |                   |                                   |                   |                            |                   |
|---------|----------------------|----------------------------|----------|------------------------------------------------------------------------|-------------------|----------------------------|-------------------|----------------------------|-------------------|---------------------------|-------------------|-----------------------------------|-------------------|----------------------------|-------------------|
|         |                      |                            |          | Spring 2018<br>25.05–28.05                                             |                   | Summer 2018<br>01.08–03.08 |                   | Autumn 2018<br>17.09–27.09 |                   | Spring 2019<br>29.0531.05 |                   | <b>*Summer 2019</b><br>27.0707.08 |                   | Autumn 2019<br>17.09–19.09 |                   |
|         |                      |                            |          | Total                                                                  | <i>F. radians</i> | Total                      | <i>F. radians</i> | Total                      | <i>F. radians</i> | Total                     | <i>F. radians</i> | Total                             | <i>F. radians</i> | Total                      | <i>F. radians</i> |
| 1       | 12 km from Kultuk    | 51 °40.578;<br>103 °52.309 | 1253     | 518±156                                                                | 435±114           | 221±10                     | 0                 | 59±10                      | 0                 | 151±14                    | 0.5±0             | 306±2                             | 80±15             | 133±84                     | 0                 |
| 2       | 3 km from Marituy    | 51 °45.546;<br>104 °13.222 | 1340     | 388±13                                                                 | 288±13            | 278±121                    | 0                 | 32±7                       | 0.43±0.6          | 1170±72                   | 0                 | -                                 | -                 | 78±30                      | 0                 |
| 2*      | 7 km from Marituy    | 51 °43.389;<br>104 °13.372 | 1340     | -                                                                      | -                 | -                          | -                 | -                          | -                 | -                         | -                 | <b>558±97</b>                     | <b>428±95</b>     | -                          | -                 |
| 3       | Marituy-Solzan       | 51 °38.710;<br>104 °13.715 | 1258     | 681±8                                                                  | 420±5             | 397±38                     | 0                 | 23±0                       | 0                 | 1350±36                   | 0                 | 190±2                             | 39±9              | 84±29                      | 0.43±0.6          |
| 4       | 3 km from Solzan     | 51 °31.428;<br>104 °14.417 | 256      | 633±52                                                                 | 492±48            | 269±72                     | 0                 | 36±8                       | 0                 | 1667±10                   | 0                 | 243±1                             | 7±4               | 49±19                      | 0                 |
| 5       | Tolsty-Snezhnaya     | 51 °36.402;<br>104 °44.147 | 1118     | 397±7                                                                  | 154±6             | 207±14                     | 0                 | 40±4                       | 0                 | 124±4                     | 8.1±0.7           | 357±22                            | 21±2              | 36±3                       | 0                 |
| 6       | 3 km from Listvyanka | 51 °49.033;<br>104 °54.616 | 1338     | 245±35                                                                 | 86±40             | 125±7                      | 0                 | 16±8                       | 0                 | 66±15                     | 1.8±0.8           | 318±120                           | 1±0               | 114±101                    | 0.20±0.3          |
| 7       | Listvyanka-Tankhoy   | 51 °42.262;<br>105 °00.720 | 1425     | 133±23                                                                 | 46±9              | 104±9                      | 0                 | 11±1                       | 0                 | 45±14                     | 2.3±0.6           | 364±67                            | 5±2               | 175±110                    | 0.41±0.6          |
| 8       | 3 km from Tankhoy    | 51 °35.440;<br>105 °06.968 | 675      | 446±1                                                                  | 317±21            | 729±104                    | 0.95±0.35         | 13±6                       | 0.74±1.0          | 235±17                    | 5.2±0             | 363±85                            | 58±1              | 46±8                       | 0                 |
| 9       | Kadilny-Mishikha     | 51 °46.731;<br>105 °22.528 | 1436     | 191±24                                                                 | 30±5              | 202±12                     | 0                 | 39±7                       | 0                 | 116±31                    | 3.6±0.4           | 488±69                            | 14±15             | 115±9                      | 0                 |
